# Supplementary material
Source: PubMed Central journal article supplement (PMC290277)
Supplement: nar_31_23_6873__1.pdf [file nar_31_23_6873__1.pdf]

**A**

Rana3 1 MPRPKEIQEQLRKKVIEIYQSGKGYKAI SKALGIQRTTVRAI IHKWRRHG  
Rana4 1 MPRPKEIQEQLRKKVIEIYQSGKGYKAI SKALGIQRTTVRAI IHKWRRHG  
Rana10 1 MPRPKEIQEQLRKKVIEIYQSGKGYKAI SKALGIQRTTVRAI IHKWRRHG  
Rana7 1 MPRPKEIQEQLRKKVIEIYQSGKGYKAI SKALGIQRTTVRAI MHK-RRHG  
Rana9 1 MPRPKEIQEQLRKKVIEIYQSGKGYKAI SKALGIQRTTVRAI IHKWRRHG  
Rana6 1 MPRPKEIQEQLRKKVIEIYQSGKGYKAI SKALGIQRTTVRAI IHKWRRHG  
Rana2 1 MPRPKEIQEQLRKKVIEIYQSGKGYKAI SKALGIQRTTVRAI IHKWRRHG  
Rana1 1 MPRPKEIQEQLRKKVIEIYQSGKGYKAI SKALGIQRTTVRAI IHKWRRHG  
Rana8 1 MPRPKEIQEQLRKKVIEIYQSGKGYKAI SKALGIQOPTVRAI IHKWEGHE  
Rana5 1 MPRPKEIQEQLRKKVIXIYQSGKGYKAI FKALXIQRRTTVRAI IXXWXXHG  
FP 1 MPRPKEIQEQLRKKVIEIYQSGKGYKAI SKALGIQRTTVRAI IHKWRRHG

Rana3 51 TVVNLPRSGRPPQITPRAQRRLIQEVTK-DPTTTSKELQASLASVKVSVHA  
Rana4 51 TVVNLPRSGRPPQITPRAQRRLIQEVTK-DPTTTSKELQASLASVKVSVHA  
Rana10 51 TVVNLPRSGRPPKITPRAQRRLIQEVTK-DPTTTSKELQASLASVKVSVHA  
Rana7 50 TVVNLPRSGPPKITPRAQRRLIQEVTKRDPTTTSKELQASLASVKVSVHA  
Rana9 51 TVVNLPRSGRPPKITPRAQRRLIQEVTK-DPTTTSKELQASLASVKVSVHA  
Rana6 51 TVVNLPRSGRPPKITPRVQRRLIQEVTK-DPTTTSKELQASLASVKVSVHA  
Rana2 51 TVVNLPRSGRPPKITPRAQRRLIQEVTK-DPTTTSKELQASLASVKVSVHA  
Rana1 51 TVVNLPRS---PKITPRAQRRLIQEVTK-DPTTTSKELQASLASVKVSVHA  
Rana8 51 TVVNLPRSGRRXXITPRAQRRLIQEVTK-DPTTNVKELQASLGSVKVSVHA  
Rana5 51 TVXNLPXSGRXAXITPRXXXRLIQEVTK-DPTTTSKELQASLASVKVSVHA  
FP 51 TVVNLPRSGRPPKITPRAQRRLIQEVTK-DPTTTSKELQASLASVKVSVHA

Rana3 101 STIRKRLGKNGLHGRVPRRKPLL SKKNIKARLNFSTTHLDDPQDFWDNII  
Rana4 101 STIRKRLGKNGLHGRVPRRKPLL SKKNIKARLNFSTTHLDDPQDFWDNII  
Rana10 101 STIRKRLGKNGLHGRVPRRKPLL SKKNIKARLNFSTTHLDDPQDFWDNII  
Rana7 100 STIRKRLGKNGLHGRVPRRKPLL SKKNIKARLNFSTTHLDDPQDFWDNII  
Rana9 101 STIRKRLGKNGLHGRVPRRKPLL SKKNIKARLNFSTTHLDDPQDFWENII  
Rana6 101 STIRKRLGKNGLHGRVPRRKPLL SKKNIKARLNFSTTHLDDPQDFWDNII  
Rana2 101 STIRKRLGKNGLHGRVPRRKPLL SKKNIKARLNFSTTHLDDPQNFWDNII  
Rana1 101 STIRKRLDKNGLHGRVPRRKPLL SKKNIKARLNFSTTHLDDPQDFWDNII  
Rana8 101 STIRKRLGKNGLHGRVPRRKPLL SKKNIKARLNFSTTHLDDPQDFWDNII  
Rana5 101 STIRKRLXKNGLHGRVPRRKPLL SKKNIKARLNFSTTHLDDPQNFWDNII  
FP 101 STIRKRLGKNGLHGRVPRRKPLL SKKNIKARLNFSTTHLDDPQDFWDNII

Rana3 151 WTDETKVELFGRCVSKYI WRRRNTALHKKNI IPTVKYGGGSVMVWGCFAA  
Rana4 151 WTDETKVELFGRCVSKYI WRRRNTALHKKNI IPTVKYGGGSVMVWGCFAA  
Rana10 151 WSDETKVELFGRCVSKYI WRRRNTAFHKKNI IPTVKYGGGSVMVWGCFAA  
Rana7 150 WTDETKVELFGRCVSKYI WRRRNTAFHKKNI IPTVKYGGGSVMVWGCFAA  
Rana9 151 WTDETKVELFGRCVSKYI WRRRNTAFHKKNI IPTVKYGGGSVMVWGCFAA  
Rana6 151 WTDETKVELFGRCVSKYI WRRRNTAFHKKNI IPTVKYGGGSVMVWGCFAA  
Rana2 151 WTDETKVELFGRCVSKYI WRRRNTAFHKKNI IPTVKYGGGSVMVWGCFAA  
Rana1 151 WTDETKVELFGRCVSKYI WRRRNTAFHKKNI IPTVKYGGGSVMVWGCFAA  
Rana8 151 WTDETKVELFGRCVSKYI WRRRNTAFHKKNI IPTVKYGGGSVMVWGCFAA  
Rana5 151 WTDETKVELFGRCVSKYI WRRRNTAFHKKNI IPTVKYGGGSVMVWGCFAA  
FP 151 WTDETKVELFGRCVSKYI WRRRNTAFHKKNI IPTVKYGGGSVMVWGCFAA

|        |     |                                                      |
|--------|-----|------------------------------------------------------|
| Rana3  | 201 | SGPGRLAVIKGTMNSAVYQEILKENVRPSVRVLKLRWVWLQQXNDPKHX    |
| Rana4  | 201 | SGPGRLAVIKGTMNSAVYQEILKENVRPSVRVLKLRWVWLQQDNDPKHT    |
| Rana10 | 201 | SGPGRLAVIKGTMNSAVYQEILKENVRPSVRVLKLRWVWLQQDNDPKHT    |
| Rana7  | 200 | SGPGRLAVIKGTMNSAVYQEILKENVRPSVRVLKLRWVWLQQNNDPKHT    |
| Rana9  | 201 | SGPGRLAVIKGTMNFAVYQEILKENVRPSVRVLKLRWVWLQQDNDPKHT    |
| Rana6  | 201 | SGPGRLAVIKGTMNSAVYQEILKENVRPSVIVLKLRWVWLQQDNDPKHT    |
| Rana2  | 201 | SGPGRLAVIKGTMNSAXYQEILKENVRPSFRVLKLRWVWLQQDNDPKHT    |
| Rana1  | 201 | SGPGRLAVIKGTMNSAVYQEILKENVRPSVRVLKLRWVWLQQDNDPKHT    |
| Rana8  | 201 | SGPGRLAVIKGTMNSAVYQEILKENVRPSVIVLKLRWVWLQDQKQDNDPKHT |
| Rana5  | 201 | SGPGRLAVIKGTMNSAVYQEILKENVRPSFRVLKXKRTWVWLQQVNDPXHT  |
| FP     | 201 | SGPGRLAVIKGTMNSAVYQEILKENVRPSVRVLKLRWVWLQQDNDPKHT    |

|        |     |                                                     |
|--------|-----|-----------------------------------------------------|
| Rana3  | 251 | SKSTTEWLKKNMKTLEWPSQSPDLNPIEMLWYDLKKAHVHARKPSNVTEL  |
| Rana4  | 251 | SKSTTEWLKKNMKTLEWPSQSPDLNPIEMLWYDLKKAHVHARKPSNVTEL  |
| Rana10 | 251 | SKSTTEWLKKNMKTLEWPSQSPDLNPIEMLWYDLKKAHVHARKPSNVTEL  |
| Rana7  | 250 | RKSTTEWLKKNMKTLEWPSQSPDLNPIEMLWYDLKKAHVHARKPSNVTEL  |
| Rana9  | 251 | SKSTTEWLKKNMKTLEWPSQSPDLNPIEMLWYDLKKAHVHARKPSNVTEL  |
| Rana6  | 251 | SKSTTEWLKKNMKTLEWPSQSPDLNPIEMFWYDLKKAHVHARKPSNVTEL  |
| Rana2  | 251 | SKSTTEWLKKNMKTLEWPSQSPDLNPIEMLWYDLKKAHVHARKPSNVTEL  |
| Rana1  | 251 | SKSTTEWLKKNMKTLEWPSQSPDLNPIEMLWYDLKKAHVHARKPSNVTEL  |
| Rana8  | 251 | SKSTTEWLKKNMKTLEWPSQSPDLNPIEMLWYDLKKAHVHARKPSNVTEL  |
| Rana5  | 251 | SKSTTEWLKXNKMKTLEWPSQSPDLNPIEMLWYDLKKAHVHARKPSNVTEL |
| FP     | 251 | SKSTTEWLKKNMKTLEWPSQSPDLNPIEMLWYDLKKAHVHARKPSNVTEL  |

|        |     |                                           |
|--------|-----|-------------------------------------------|
| Rana3  | 301 | GQFCKDEWAKIPPGCCCKSLIARYRKRLVAVVAAKGGPTSY |
| Rana4  | 301 | GQFCKDEWAKIPPGCCCKSLIARYRKRLVAVVAAKGGPTSY |
| Rana10 | 301 | GQFCKDEWAKIPPGCCCKSLIARYRKRLVAVVAAKGGPTSY |
| Rana7  | 300 | GQFCKDEWAKIPPGRCKSLIARYRKRLVAVVAAKGGPTSY  |
| Rana9  | 301 | GQFCKDEWAKIPPGRCKSLIARYRKRLVAVVAAKGGPTSY  |
| Rana6  | 301 | GQFCKDEWAKIPPGRCKSLIARYRKRLVAVVAAKGGPTSY  |
| Rana2  | 301 | GQFCKDE-AKIPPGRCKSLIARYRKRLVAVVAAKGGPTSY  |
| Rana1  | 301 | GQFCKDEWAKIPPGRCKSLIARYRKRLVAVVIAKGGPTSY  |
| Rana8  | 301 | GQFCKDEWAKIPPGRCKSLIGTSL-----             |
| Rana5  | 301 | GQFCKDE-AKIPPGRCKXSLIARYRKRLVAVVAAKGGPTSY |
| FP     | 301 | GQFCKDEWAKIPPGRCKSLIARYRKRLVAVVAAKGGPTSY  |

**B**

SB 1 MGKSKETISQDLRKKIVDLHKSGSSLGAI SKRLKVP RSSVQTI VRKYKHHGTTQPSYRSGR  
FP 1 MPRPKETIQEQLRKKVIEIYQSGKGYKAISKALGIQRTTVRAIIHKWRRHGTVVNLPRSGR

SB 61 RRVLSPRDERTLV RKVQINPRTIAKDLVKMLEETGTKVSI STVKRVLYRHNLKGRSARKK  
FP 61 PPKITPRAQRRLIQEVTKDPTTTSKELQASLASVKVSVHASTIRKRLGKNGLHGRVPRRK

SB 121 PLLQNRHKKARLRFATAHGD KDRTFWRNVLWSDETKIE LFGHNDHRYVWRKKGEACKPKN  
FP 121 PLLSKKNIKARLNFSTTHLDDPQDFW DNI LWIDETKVELFGRCVSKYIWRRRNTAFHKKN

SB 181 TIPTVKHGGGSIMLWGCFAAGGTGALHKIDGIMRKENYVDILKQHLKTSVRK LKLGRKWV  
FP 181 IIP TVKYGGGSVMVWGCFAASGPGRLAVIKGTMNSAVYQEILKENVRP SVRVLK LKRTWV

SB 241 FQMDNDPKHTSKV VAKWLKDNKVKVLEWPSQSPDLNPIENLWAE LKKRVRARRPTNLTQL  
FP 241 LQDNDPKHTSKSTTEWLKKNKMKTLEWPSQSPDLNPIEMLWYDLKKA V HARKPSNVTEL

SB 301 HOLCQEEWAKIHPTYCGKLV EGYPKRLTQVKQFKGNATKY  
FP 301 GQFCKDEWAKIPPGRCKSLIARYRKRLVAVVAAKGGPTSY
